# Supplementary material for: Modeling Gully Erosion Susceptibility to Evaluate Human Impact on a Local Landscape System in Tigray, Ethiopia
Source: MDPI journal article supplement (doi:10.3390/rs13102009), 2021-05-20
Supplement: s1 [file s1]

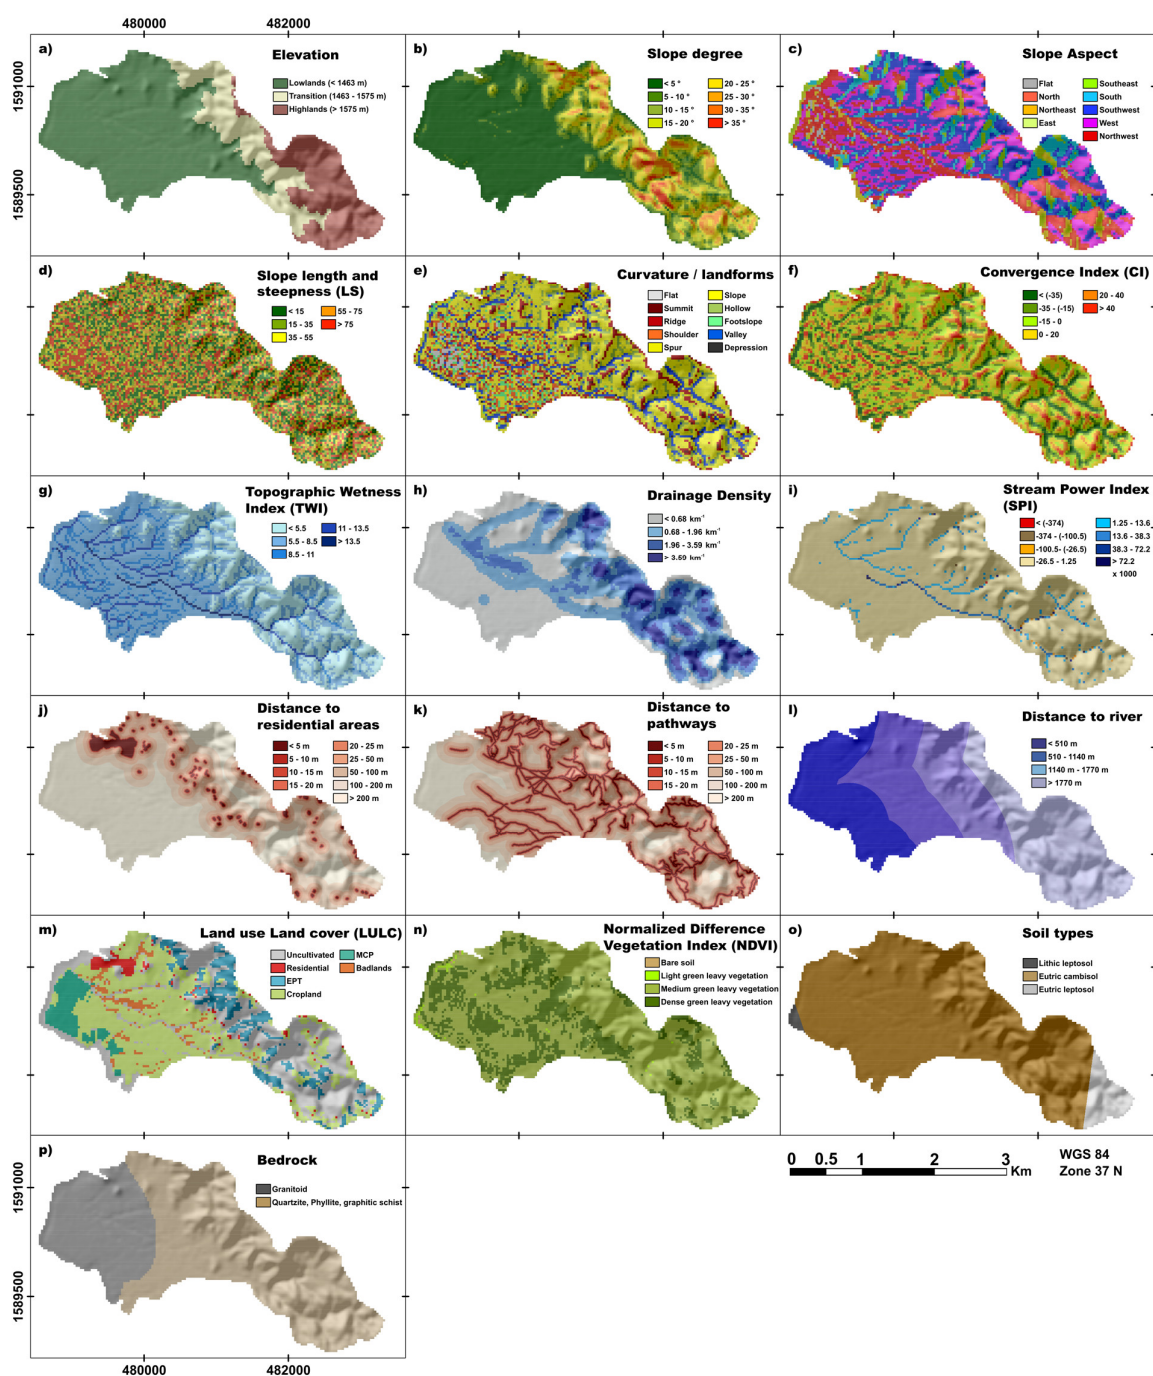

**Figure S1.** Gully erosion conditioning factors of the study catchment tributary to the Inda Shawit River: a) Elevation, b) Slope, c) Slope aspect, d) Slope length and steepness factor (LS), e) Geomorphons, f) Convergence Index (CI), g) Topographic Wetness Index (TWI), h) Drainage density, i) Stream Power Index (SPI), j) Distance to residential areas, k) Distance to pathways, l) Distance to river, m) Land use land cover (LULC), n) Normalized Difference Vegetation Index (NDVI), o) Soil types, p) Bedrock.

**Table S1.** Spatial coverage and distribution of gully heads among all conditioning factors.

| Conditioning Factors | Class       | Area coverage | Gully heads | Share of Gully heads |
|----------------------|-------------|---------------|-------------|----------------------|
| Elevation            | < 1463      | 60 %          | 62          | 11 %                 |
|                      | 1463 - 1575 | 19 %          | 208         | 38 %                 |

| Conditioning Factors                          | Class                         | Area coverage | Gully heads | Share of Gully heads |
|-----------------------------------------------|-------------------------------|---------------|-------------|----------------------|
|                                               | > 1575                        | 21 %          | 275         | 51 %                 |
| Slope degree                                  | < 5                           | 49 %          | 44          | 8 %                  |
|                                               | 5 - 10                        | 10 %          | 34          | 6 %                  |
|                                               | 10 - 15                       | 10 %          | 50          | 9 %                  |
|                                               | 15 - 20                       | 10 %          | 90          | 17 %                 |
|                                               | 20 - 25                       | 10 %          | 128         | 23 %                 |
|                                               | 25 - 30                       | 6 %           | 98          | 18 %                 |
|                                               | 30 - 35                       | 3 %           | 72          | 13 %                 |
|                                               | > 35                          | 1 %           | 29          | 5 %                  |
| Slope aspect                                  | Flat                          | 1 %           | 0           | 0 %                  |
|                                               | North                         | 8 %           | 41          | 8 %                  |
|                                               | Northeast                     | 4 %           | 26          | 5 %                  |
|                                               | East                          | 2 %           | 18          | 3 %                  |
|                                               | Southeast                     | 4 %           | 12          | 2 %                  |
|                                               | South                         | 12 %          | 57          | 10 %                 |
|                                               | Southwest                     | 26 %          | 143         | 26 %                 |
|                                               | West                          | 26 %          | 217         | 40 %                 |
| Slope length and steepness (LS)               | Northwest                     | 15 %          | 31          | 6 %                  |
|                                               | < 15                          | 27 %          | 140         | 26 %                 |
|                                               | 15 - 35                       | 16 %          | 99          | 18 %                 |
|                                               | 35 - 55                       | 16 %          | 74          | 14 %                 |
|                                               | 55 - 75                       | 16 %          | 112         | 21 %                 |
| Curvature / landforms                         | > 75                          | 25 %          | 120         | 22 %                 |
|                                               | Flat                          | 2 %           | 0           | 0 %                  |
|                                               | Summit                        | 1 %           | 0           | 0 %                  |
|                                               | Ridge                         | 12 %          | 36          | 7 %                  |
|                                               | Shoulder                      | 6 %           | 2           | 0 %                  |
|                                               | Spur                          | 16 %          | 141         | 26 %                 |
|                                               | Slope                         | 33 %          | 218         | 40 %                 |
|                                               | Hollow                        | 14 %          | 98          | 18 %                 |
|                                               | Footslope                     | 4 %           | 1           | 0 %                  |
|                                               | Valley                        | 13 %          | 48          | 9 %                  |
| Convergence Index (CI)                        | Depression                    | 1 %           | 1           | 0 %                  |
|                                               | < (-35)                       | 10 %          | 34          | 6 %                  |
|                                               | -35 - (-15)                   | 19 %          | 81          | 15 %                 |
|                                               | -15 - 0                       | %             | 138         | 25 %                 |
|                                               | 0 - 20                        | 27 %          | 212         | 39 %                 |
|                                               | 20 - 40                       | 15 %          | 68          | 12 %                 |
| Land use land cover (LULC)                    | > 40                          | 7 %           | 12          | 2 %                  |
|                                               | Uncultivated land             | 34 %          | 349         | 64 %                 |
|                                               | Residential                   | 3 %           | 2           | 0 %                  |
|                                               | Erosion Protection terraces   | 11 %          | 135         | 25 %                 |
|                                               | Cropland                      | 42 %          | 37          | 7 %                  |
|                                               | Mixed Cropland and Plantation | 6 %           | 0           | 0 %                  |
| Normalized Difference Vegetation Index (NDVI) | Badlands                      | 4 %           | 22          | 4 %                  |
|                                               | Water bodies                  | 0 %           | 0           | 0 %                  |
|                                               | Wetlands                      | 0 %           | 0           | 0 %                  |
|                                               | Bare soil                     | 0 %           | 0           | 0 %                  |
|                                               | Light green leavy vegetation  | 1 %           | 0           | 0 %                  |

| Conditioning Factors            | Class                                 | Area coverage | Gully heads | Share of Gully heads |
|---------------------------------|---------------------------------------|---------------|-------------|----------------------|
|                                 | Medium green leavy vegetation         | 70 %          | 528         | 97 %                 |
|                                 | Dense green leavy vegetation          | 29 %          | 17          | 3 %                  |
| Bedrock                         | Granitoid                             | 32 %          | 28          | 5 %                  |
|                                 | Quartzite, Phyllite, graphitic Schist | 68 %          | 517         | 95 %                 |
| Soil type                       | Eutric leptosol                       | 6 %           | 103         | 19 %                 |
|                                 | Eutric cambisol                       | 93 %          | 442         | 81 %                 |
|                                 | Lithic leptosol                       | 1 %           | 0           | 0 %                  |
| Drainage Density                | < 0.68                                | 41 %          | 12          | 2 %                  |
|                                 | 0.68 - 1.96                           | 32 %          | 107         | 20 %                 |
|                                 | 1.96 - 3.59                           | 20 %          | 233         | 43 %                 |
|                                 | > 3.59                                | 8 %           | 193         | 35 %                 |
| Distance to river               | < 510                                 | 27 %          | 13          | 2 %                  |
|                                 | 510 - 1140                            | 21 %          | 27          | 5 %                  |
|                                 | 1140 - 1770                           | 19 %          | 101         | 19 %                 |
|                                 | 1770 - 2430                           | 17 %          | 218         | 40 %                 |
|                                 | > 2430                                | 16 %          | 187         | 34 %                 |
| Stream Power Index (SPI)        | < -374 k                              | 0 %           | 1           | 0 %                  |
|                                 | -374 k - (-100.5 k)                   | 0 %           | 1           | 0 %                  |
|                                 | -100.5 k - (-26.5 k)                  | 0 %           | 1           | 0 %                  |
|                                 | -26.5 k - 1.25 k                      | 93 %          | 528         | 97 %                 |
|                                 | 1.25 k - 13.6 k                       | 5 %           | 14          | 3 %                  |
|                                 | 13.6 k - 38.3 k                       | 1 %           | 0           | 0 %                  |
|                                 | 38.3 k - 72.2 k                       | 0 %           | 0           | 0 %                  |
|                                 | > 72.2 k                              | 0 %           | 0           | 0 %                  |
| Topographic Wetness Index (TWI) | < 5.5                                 | 29 %          | 366         | 67 %                 |
|                                 | 5.5 - 8.5                             | 53 %          | 156         | 29 %                 |
|                                 | 8.5 - 11                              | 12 %          | 17          | 3 %                  |
|                                 | 11 - 13.5                             | 5 %           | 6           | 1 %                  |
|                                 | > 13.5                                | 1 %           | 0           | 0 %                  |
| Distance to pathways            | < 5                                   | 11 %          | 112         | 21 %                 |
|                                 | 5 - 10                                | 6 %           | 39          | 7 %                  |
|                                 | 10 - 15                               | 6 %           | 33          | 6 %                  |
|                                 | 15 - 20                               | 5 %           | 22          | 4 %                  |
|                                 | 20 - 25                               | 6 %           | 39          | 7 %                  |
|                                 | 25 - 50                               | 20 %          | 116         | 21 %                 |
|                                 | 50 - 100                              | 22 %          | 123         | 23 %                 |
|                                 | 100 - 200                             | 15 %          | 56          | 10 %                 |
|                                 | > 200                                 | 9 %           | 6           | 1 %                  |
| Distance to residential areas   | < 5                                   | 3 %           | 2           | 0 %                  |
|                                 | 5 - 10                                | 1 %           | 0           | 0 %                  |
|                                 | 10 - 15                               | 1 %           | 1           | 0 %                  |
|                                 | 15 - 20                               | 1 %           | 1           | 0 %                  |
|                                 | 20 - 25                               | 2 %           | 4           | 1 %                  |
|                                 | 25 - 50                               | 8 %           | 28          | 5 %                  |
|                                 | 50 - 100                              | 16 %          | 124         | 23 %                 |
|                                 | 100 - 200                             | 24 %          | 214         | 39 %                 |
|                                 | > 200                                 | 44 %          | 172         | 32 %                 |

**Table S2.** Distribution of gully heads among all differences between Models B and C. I) Areas not susceptible in both models, II) Areas not susceptible in Model C but B, III) Areas classified moderate in Model B or will classify moderate in Model C, IV) Areas not susceptible in Model B but in C and V) Areas susceptible in both models.

| Conditioning Factors                          | Class                                 | I  | II  | III | IV  | V   | Σ   |
|-----------------------------------------------|---------------------------------------|----|-----|-----|-----|-----|-----|
| Elevation                                     | < 1463                                | 30 | 21  | 2   | 9   | 0   | 62  |
|                                               | 1463 - 1575                           | 11 | 79  | 4   | 51  | 63  | 208 |
|                                               | > 1575                                | 8  | 56  | 1   | 91  | 120 | 276 |
| Slope degree                                  | < 5                                   | 28 | 11  | 1   | 4   | 0   | 44  |
|                                               | 5 - 10                                | 5  | 15  | 0   | 11  | 3   | 34  |
|                                               | 10 - 15                               | 5  | 16  | 1   | 14  | 14  | 50  |
|                                               | 15 - 20                               | 5  | 24  | 0   | 25  | 37  | 91  |
|                                               | 20 - 25                               | 3  | 29  | 3   | 38  | 55  | 128 |
|                                               | 25 - 30                               | 1  | 26  | 1   | 43  | 27  | 98  |
|                                               | 30 - 35                               | 2  | 20  | 0   | 10  | 40  | 72  |
|                                               | > 35                                  | 0  | 15  | 1   | 6   | 7   | 29  |
| Slope aspect                                  | flat                                  | 0  | 0   | 0   | 0   | 0   | 0   |
|                                               | North                                 | 4  | 4   | 1   | 5   | 27  | 41  |
|                                               | Northeast                             | 2  | 6   | 0   | 5   | 13  | 26  |
|                                               | East                                  | 1  | 4   | 0   | 9   | 4   | 18  |
|                                               | Southeast                             | 2  | 6   | 0   | 4   | 0   | 12  |
|                                               | South                                 | 4  | 17  | 1   | 18  | 17  | 57  |
|                                               | Southwest                             | 12 | 38  | 2   | 24  | 67  | 143 |
|                                               | West                                  | 22 | 70  | 1   | 78  | 47  | 218 |
| Slope length and steepness (LS)               | Northwest                             | 2  | 11  | 2   | 8   | 8   | 31  |
|                                               | < 15                                  | 13 | 29  | 1   | 51  | 47  | 141 |
|                                               | 15 - 35                               | 11 | 32  | 1   | 30  | 25  | 99  |
|                                               | 35 - 55                               | 6  | 17  | 3   | 28  | 20  | 74  |
|                                               | 55 - 75                               | 6  | 33  | 0   | 25  | 48  | 112 |
| Curvature / land-forms                        | > 75                                  | 13 | 45  | 2   | 17  | 43  | 120 |
|                                               | Flat                                  | 0  | 0   | 0   | 0   | 0   | 1   |
|                                               | Summit                                | 0  | 0   | 0   | 0   | 0   | 0   |
|                                               | Ridge                                 | 8  | 6   | 1   | 14  | 8   | 37  |
|                                               | Shoulder                              | 0  | 2   | 0   | 0   | 0   | 2   |
|                                               | Spur                                  | 10 | 51  | 1   | 43  | 36  | 141 |
|                                               | Slope                                 | 11 | 54  | 4   | 60  | 89  | 218 |
|                                               | Hollow                                | 10 | 28  | 1   | 30  | 29  | 98  |
|                                               | Footslope                             | 1  | 0   | 0   | 0   | 0   | 1   |
|                                               | Valley                                | 9  | 15  | 0   | 4   | 20  | 48  |
|                                               | Depression                            | 0  | 0   | 0   | 0   | 1   | 1   |
| Convergence Index (CI)                        | < (-35)                               | 5  | 15  | 0   | 3   | 11  | 34  |
|                                               | -35 - (-15)                           | 10 | 15  | 1   | 21  | 34  | 81  |
|                                               | -15 - 0                               | 9  | 38  | 3   | 23  | 65  | 138 |
|                                               | 0 - 20                                | 17 | 63  | 2   | 77  | 54  | 213 |
|                                               | 20 - 40                               | 5  | 24  | 1   | 19  | 19  | 68  |
|                                               | > 40                                  | 3  | 1   | 0   | 8   | 0   | 12  |
| Land use land cover (LULC)                    | Uncultivated land                     | 7  | 80  | 0   | 119 | 144 | 350 |
|                                               | Residential                           | 0  | 0   | 2   | 0   | 0   | 2   |
|                                               | Erosion protection terraces           | 6  | 53  | 5   | 32  | 39  | 135 |
|                                               | Cropland                              | 22 | 15  | 0   | 0   | 0   | 37  |
|                                               | Mixed cropland and plantation         | 0  | 0   | 0   | 0   | 0   | 0   |
|                                               | Badlands                              | 14 | 8   | 0   | 0   | 0   | 22  |
| Normalized Difference Vegetation Index (NDVI) | Water bodies                          | 0  | 0   | 0   | 0   | 0   | 0   |
|                                               | Wetlands                              | 0  | 0   | 0   | 0   | 0   | 0   |
|                                               | Bare soil                             | 0  | 0   | 0   | 0   | 0   | 0   |
|                                               | Light green leavy vegetation          | 0  | 0   | 0   | 0   | 0   | 0   |
|                                               | Medium green leavy vegetation         | 41 | 150 | 6   | 151 | 181 | 529 |
|                                               | Dense green leavy vegetation          | 8  | 6   | 1   | 0   | 2   | 17  |
| Bedrock                                       | Granitoid                             | 16 | 9   | 1   | 2   | 0   | 28  |
|                                               | Quartzite, phyllite, graphitic Schist | 33 | 147 | 6   | 149 | 183 | 518 |
| Soil type                                     | Eutric leptosol                       | 0  | 0   | 0   | 0   | 0   | 0   |
|                                               | Eutric cambisol                       | 2  | 40  | 0   | 21  | 41  | 104 |
|                                               | Lithic leptosol                       | 47 | 116 | 7   | 130 | 142 | 442 |
| Drainage density                              | < 0.68                                | 6  | 0   | 2   | 4   | 0   | 12  |
|                                               | 0.68 - 1.96                           | 38 | 4   | 4   | 62  | 0   | 108 |

| Conditioning Factors            | Class                | I  | II  | III | IV  | V   | $\Sigma$ |
|---------------------------------|----------------------|----|-----|-----|-----|-----|----------|
| Distance to river               | 1.96 - 3.59          | 5  | 78  | 1   | 54  | 95  | 233      |
|                                 | > 3.59               | 0  | 74  | 0   | 31  | 88  | 193      |
|                                 | < 510                | 9  | 1   | 1   | 2   | 0   | 13       |
|                                 | 510 - 1140           | 15 | 11  | 0   | 1   | 0   | 27       |
|                                 | 1140 - 1770          | 11 | 35  | 3   | 35  | 17  | 101      |
|                                 | 1770 - 2430          | 9  | 53  | 2   | 61  | 93  | 218      |
|                                 | > 2430               | 5  | 56  | 1   | 52  | 73  | 187      |
| Stream Power Index (SPI)        | < -374 k             | 0  | 1   | 0   | 0   | 0   | 1        |
|                                 | -374 k - (-100.5 k)  | 0  | 0   | 0   | 0   | 1   | 1        |
|                                 | -100.5 k - (-26.5 k) | 0  | 1   | 0   | 0   | 0   | 1        |
|                                 | -26.5 k - 1.25 k     | 47 | 152 | 7   | 144 | 179 | 529      |
|                                 | 1.25 k - 13.6 k      | 2  | 2   | 0   | 7   | 3   | 14       |
|                                 | 13.6 k - 38.3 k      | 0  | 0   | 0   | 0   | 0   | 0        |
|                                 | 38.3 k - 72.2 k      | 0  | 0   | 0   | 0   | 0   | 0        |
|                                 | > 72.2 k             | 0  | 0   | 0   | 0   | 0   | 0        |
| Topographic Wetness Index (TWI) | < 5.5                | 12 | 110 | 5   | 105 | 135 | 367      |
|                                 | 5.5 - 8.5            | 27 | 37  | 2   | 46  | 44  | 156      |
|                                 | 8.5 - 11             | 7  | 7   | 0   | 0   | 3   | 17       |
|                                 | 11 - 13.5            | 3  | 2   | 0   | 0   | 1   | 6        |
|                                 | > 13.5               | 0  | 0   | 0   | 0   | 0   | 0        |
| Distance to pathways            | < 5                  | 11 | 31  | 2   | 36  | 32  | 112      |
|                                 | 5 - 10               | 1  | 17  | 1   | 10  | 10  | 39       |
|                                 | 10 - 15              | 1  | 10  | 1   | 8   | 13  | 33       |
|                                 | 15 - 20              | 2  | 2   | 1   | 10  | 7   | 22       |
|                                 | 20 - 25              | 4  | 8   | 1   | 10  | 16  | 39       |
|                                 | 25 - 50              | 6  | 23  | 0   | 39  | 48  | 116      |
|                                 | 50 - 100             | 18 | 34  | 0   | 30  | 41  | 123      |
|                                 | 100 - 200            | 6  | 26  | 0   | 8   | 16  | 56       |
|                                 | > 200                | 0  | 5   | 1   | 0   | 0   | 6        |
| Distance to residential areas   | < 5                  | 0  | 0   | 2   | 0   | 0   | 2        |
|                                 | 5 - 10               | 0  | 0   | 0   | 0   | 0   | 0        |
|                                 | 10 - 15              | 0  | 1   | 0   | 0   | 0   | 1        |
|                                 | 15 - 20              | 1  | 0   | 0   | 0   | 0   | 1        |
|                                 | 20 - 25              | 1  | 0   | 0   | 3   | 0   | 4        |
|                                 | 25 - 50              | 2  | 0   | 2   | 18  | 6   | 28       |
|                                 | 50 - 100             | 2  | 6   | 2   | 62  | 52  | 124      |
|                                 | 100 - 200            | 12 | 9   | 0   | 68  | 125 | 214      |
|                                 | > 200                | 31 | 140 | 1   | 0   | 0   | 172      |

Table S3. Multicollinearity of gully erosion conditioning factors by measures of the variable inflation factor.

| Conditioning Factors                          | Model A | Model B | Model C |
|-----------------------------------------------|---------|---------|---------|
| Elevation                                     | 2.03    | 1.77    | -       |
| Slope degree                                  | 2.13    | 2.00    | -       |
| Slope aspect                                  | 1.08    | 1.07    | -       |
| Slope length and steepness (LS)               | 1.04    | 1.03    | -       |
| Curvature / landforms                         | 2.66    | 2.63    | -       |
| Convergence Index (CI)                        | 2.87    | 2.85    | -       |
| Normalized Difference Vegetation Index (NDVI) | 1.18    | 1.16    | -       |
| Bedrock                                       | 1.70    | 1.66    | -       |
| Soil                                          | 1.37    | 1.34    | -       |
| Drainage density                              | 1.41    | 1.24    | -       |
| Distance to river                             | 1.09    | 1.09    | -       |
| Stream Power Index (SPI)                      | 1.06    | 1.06    | -       |
| Topographic Wetness Index (TWI)               | 2.65    | 2.61    | -       |
| Land use land cover (LULC)                    | 1.62    | -       | 1.03    |
| Distance to pathways                          | 1.17    | -       | 1.01    |
| Distance to residential areas                 | 1.17    | -       | 1.04    |
